# Supplementary material for: TNF-α in Combination with Palmitate Enhances IL-8 Production via The MyD88- Independent TLR4 Signaling Pathway: Potential Relevance to Metabolic Inflammation
Source: MDPI journal article supplement (doi:10.3390/ijms20174112), 2019-08-23
Supplement: s1 [file s1]

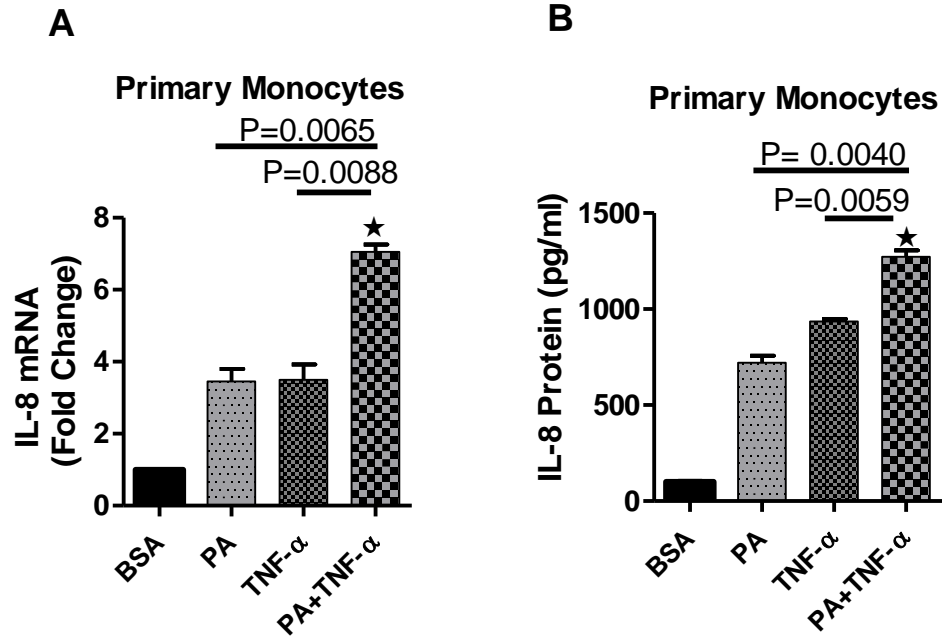

**Supplemental Figure 1.** Primary monocytes were isolated from PBMCs of healthy volunteers as described previously [38]. Monocytes were incubated with palmitate (15 $\mu$ M) and/or TNF- $\alpha$  (100pg) for 24 h. IL-8 mRNA (A) and secreted protein (B) were determined by real-time RT-PCR and ELISA. The results obtained from three replicates of each experiment are shown. Data are expressed as mean  $\pm$  SEM.
